# Supplementary material
Source: ML conference proceedings conference paper supplement (https://aclanthology.org/2024.lrec-main.111)
Supplement: OptionalSupplementaryMaterial [file 2024.lrec-main.111.OptionalSupplementaryMaterial.zip]

Archive with 1 entries (1 files):
- FoodTweet___Images__MT__NER__Sentiment_____LREC_COLING____Appendix-1.pdf
